# Supplementary material
Source: Springer Nature journal article supplement (https://www.springermedizin.de/resource/supplementary/12990_2009_212_MOESM1_ESM.pdf/9612798)

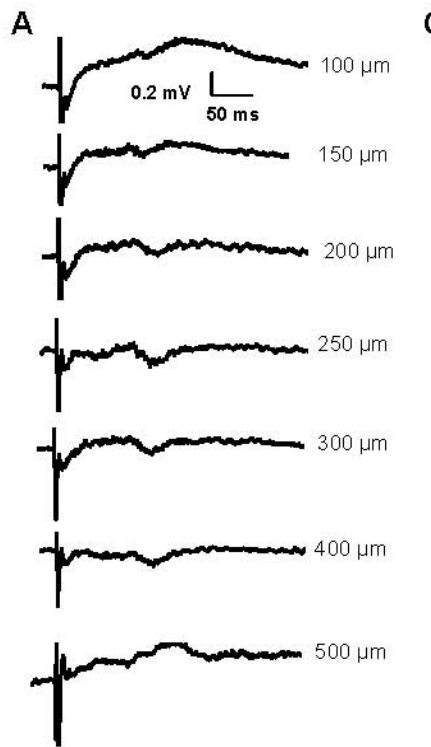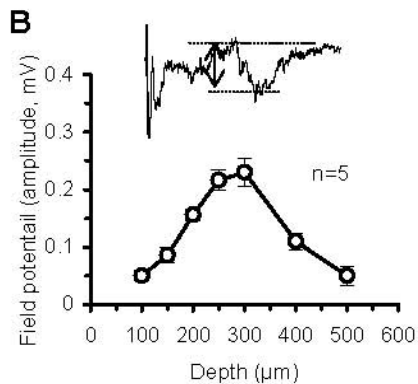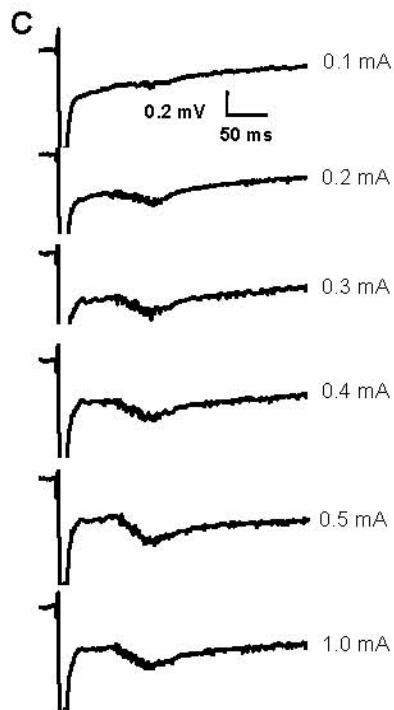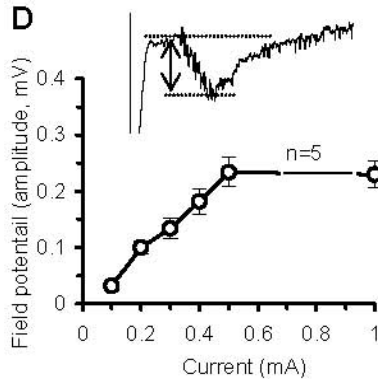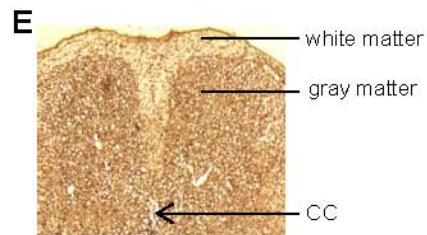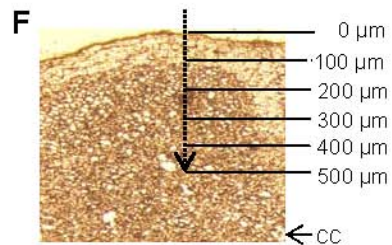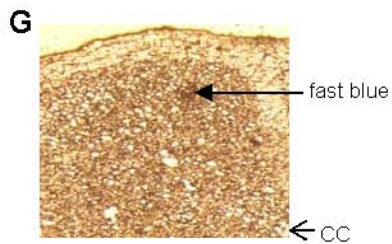

Supplement: MOESM1 [file 9612798]
